# Supplementary material
Source: PubMed Central journal article supplement (PMC3907763)

**Supplemental Table 1: University of Michigan cGVHD characteristics**

**Supplemental Table 2: 130 analytes assessed by Quantibody™ Array**

**Supplemental Table 3: CXCL9 Sensitivity and Specificity for the diagnosis of cGVHD in the University of Michigan (UM) and Fred Hutchinson Cancer Research Center (FHCRC) validation cohorts**

**Supplemental Figure 1: Receiver operating characteristic (ROC) Curves for the University of Michigan Validation Set.** (A) ROC curves for the five individual biomarkers at the onset of *de novo* cGVHD (n=45) and time-matched no cGVHD (n=64). CD13 (dotted line .....): AUC = 0.62); IL2R $\alpha$  (short dash - -): AUC 0.65; BAFF (dash dot - · -): AUC 0.65); Elafin (long dash - - -): AUC 0.67; CXCL9 (solid black —): AUC 0.83. (B) ROC curves for a 4 protein composite that excludes CXCL9 (black dot .....): AUC 0.74; 5 protein composite (thick black —): AUC 0.83; CXCL9 (thin black —): AUC 0.83.

**Supplemental Table 1: University of Michigan Chronic Graft-vs.-Host Disease (cGVHD) Characteristics**

| Characteristic                                             | Discovery Cohort<br>N=17 | UM Validation Cohort<br>N=45 | P value for difference<br>between Discovery<br>and Validation |   |    |    |    |    |
|------------------------------------------------------------|--------------------------|------------------------------|---------------------------------------------------------------|---|----|----|----|----|
| <b>Time to cGVHD diagnosis, days</b>                       |                          |                              |                                                               |   |    |    |    |    |
| Median                                                     | 129                      | 136                          | 0.52                                                          |   |    |    |    |    |
| Range                                                      | 97–230                   | 53–336                       |                                                               |   |    |    |    |    |
| <b>Time to sample acquisition<br/>from diagnosis, days</b> |                          |                              |                                                               |   |    |    |    |    |
| Median                                                     | 0                        | 0                            | 0.45                                                          |   |    |    |    |    |
| Range                                                      | -50 to +12               | -42 to +35                   |                                                               |   |    |    |    |    |
| <b>NIH Global Severity at Onset</b>                        |                          |                              |                                                               |   |    |    |    |    |
| Mild                                                       | –                        | 4 (9%)                       | 0.04                                                          |   |    |    |    |    |
| Moderate                                                   | 6 (35%)                  | 25 (56%)                     |                                                               |   |    |    |    |    |
| Severe                                                     | 11 (59%)                 | 16 (35%)                     |                                                               |   |    |    |    |    |
| <b>Onset Organ Involvement</b>                             | <b>NIH Severity</b>      |                              |                                                               |   |    |    |    |    |
|                                                            | n                        | 1                            | 2                                                             | 3 | n  | 1  | 2  | 3  |
| Skin                                                       | 9                        | 5                            | 3                                                             | 1 | 17 | 10 | 4  | 3  |
| Mouth                                                      | 14                       | 9                            | 5                                                             | 0 | 36 | 26 | 9  | 1  |
| Eyes                                                       | 7                        | 5                            | 1                                                             | 1 | 11 | 9  | 2  | 0  |
| GI                                                         | 3                        | 3                            | 0                                                             | 0 | 11 | 7  | 3  | 1  |
| Liver                                                      | 13                       | 2                            | 4                                                             | 7 | 30 | 6  | 12 | 12 |
| Lung                                                       | 7                        | 5                            | 0                                                             | 2 | 6  | 5  | 1  | 0  |
| Joints                                                     | 2                        | 2                            | 0                                                             | 0 | 2  | 2  | 0  | 0  |
| GU                                                         | 0                        | 0                            | 0                                                             | 0 | 4  | 2  | 2  | 0  |

Abbreviations: NIH, National Institutes of Health

**Supplemental Table 2: Panel of 130 Biomarkers Tested by Quantibody™ Array**

|                   |                      |               |              |                  |
|-------------------|----------------------|---------------|--------------|------------------|
| sBAFF             | IL-10                | MIF           | VEGF-D       | IGFBP-2          |
| B2M               | IL-12p70             | CXCL9         | BLC          | IGFBP-3          |
| CA15-3/EMA/MUC1   | IL-13                | CCL3          | Eotaxin-1    | IGFBP-4          |
| CEACAM            | IL-15                | CCL4          | Eotaxin-2    | IGFBP-6          |
| E-cadherin        | IL-16                | CCL15         | Eotaxin-3    | IGF-1            |
| EpCAM             | IL-17                | CCL20         | IL-2         | Insulin          |
| Fas               | IL-17F               | CCL19         | IL-11        | NGFR             |
| GITR              | IL-18BP <sub>a</sub> | CCL23         | IL-12p40     | NT-3             |
| IL-2R $\alpha$    | IL-1 $\alpha$        | NAP-2         | TIMP-2       | NT-4             |
| LAP/TGF $\beta$ 1 | IL-1 $\beta$         | CCL18         | AR           | OPG              |
| Trappin-2/Elafin  | IL-6sR               | PDGF-AA       | BDNF         | PIGF             |
| CCL21             | IL-7                 | PDGF-BB       | bFGF         | SCF              |
| CCL28             | IL-8                 | PF4           | BMP-4        | SCFR             |
| CXCL16            | IL-9                 | RANTES        | BMP-5        | VEGF             |
| GCSF              | IL-10                | DSF-1         | BMP-7        | VEGFR2           |
| GM-CSF            | CXCL10               | CCL17         | $\beta$ -NGF | VEGFR3           |
| GRO               | LIP                  | CCL25         | EGF          | BTC              |
| HCC-1             | LIGHT                | TGF $\alpha$  | EGF-R        | CTACK            |
| HCC-4             | Lymphotactin         | TGF $\beta$ 1 | EG-VEGF      | ENA-78           |
| HGF               | MCP-1                | TGF $\beta$ 3 | FGF-4        | Eotaxin-3        |
| CCL1              | MCP-2                | TIMP-1        | FGF-7        | GCP-2            |
| ICAM-1            | MCP-3                | TNFR1         | GDF-15       | IL-28 $\alpha$   |
| IFN $\gamma$      | MCP-4                | TNFR2         | GDNF         | IL-29            |
| IL-4              | MCSF                 | TNF- $\alpha$ | GH           | IL-30            |
| IL-5              | MCSFR                | TNF- $\beta$  | HB-EGF       | MSP <sub>a</sub> |
| IL-6              | CCL22                | TSLP          | IGFBP-1      | OPN              |

Supplemental Figure 3: **CXCL9 Sensitivity and Specificity for the diagnosis of cGVHD in the University of Michigan (UM) and Fred Hutchinson Cancer Research Center (FHCRC) validation cohorts**

|                             | <b>CXCL9 Threshold (pg/ml)</b> |                              | <b>Sensitivity % (95% CI)</b> |                              | <b>Specificity % (95% CI)</b> |                              |
|-----------------------------|--------------------------------|------------------------------|-------------------------------|------------------------------|-------------------------------|------------------------------|
|                             | <b>UM Validation</b>           | <b>FHCRC Newly Diagnosed</b> | <b>UM Validation</b>          | <b>FHCRC Newly Diagnosed</b> | <b>UM Validation</b>          | <b>FHCRC Newly Diagnosed</b> |
| 25 <sup>th</sup> percentile | 2.5                            | 15                           | 93 (82–99)                    | 76 (65–84)                   | 41 (29–54)                    | 36 (20–54)                   |
| Median                      | 6.5                            | 26                           | 87 (73–95)                    | 59 (48–70)                   | 77 (64–86)                    | 70 (51–84)                   |
| 75 <sup>th</sup> percentile | 15.6                           | 54.5                         | 44 (30–60)                    | 41 (30–51)                   | 89 (79–95)                    | 90 (76–98)                   |

Abbreviations: cGVHD, chronic graft-vs.-host disease; CXCL9, chemokine (C-X-C motif) ligand 9; CI, confidence interval

Supplemental Figure 1:

**A**

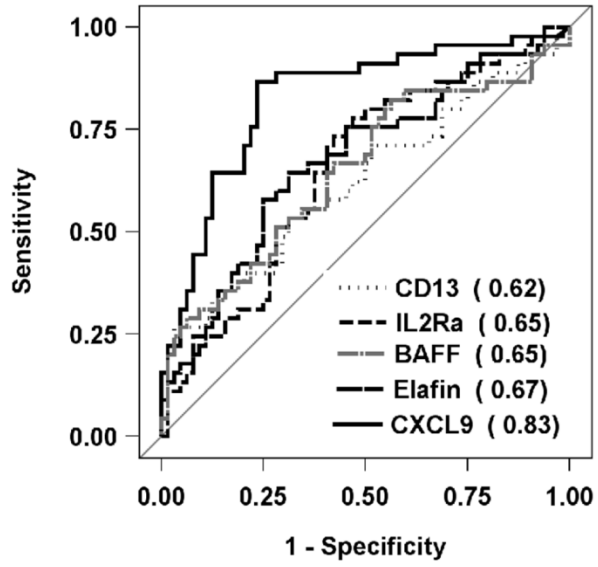

**B**

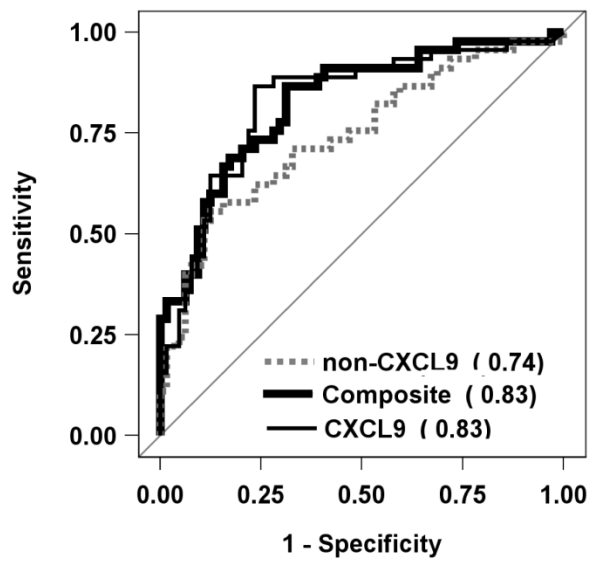

Supplement: supp_blood-2013-08-520072_blood-2013-08-520072-1.pdf [file supp_blood-2013-08-520072_blood-2013-08-520072-1.pdf]
